# Supplementary material
Source: MDPI journal article supplement (https://www.mdpi.com/2221-3759/6/3/19)
Supplement: s1 [file s1]

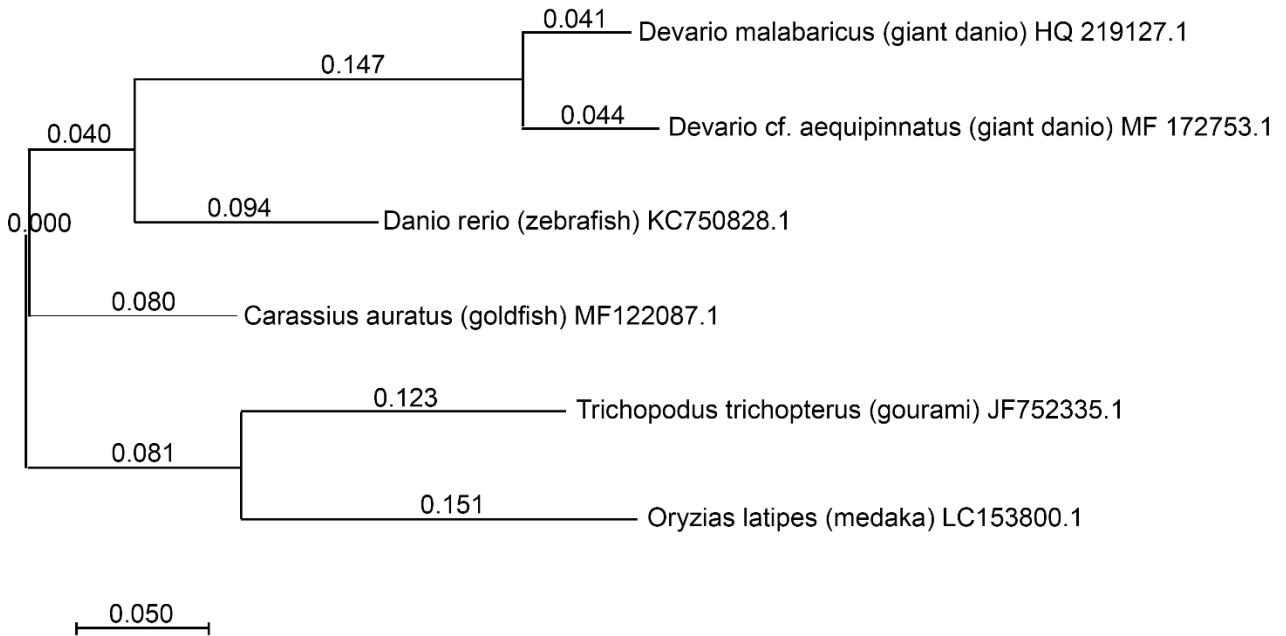

**Supplemental Figure 1: Phylogram of giant danios.** Phylogram of relationships of giant danios (*Devario malabaricus* and *Devario cf. aequipinnatus*), and select species used in cardiovascular research, inferred by Maximum Likelihood method using the mitochondrial *COI* gene. The tree is drawn to scale, with branch lengths measured in the number of substitution per site (next to the branch). Evolutionary analysis were conducted in MEGA 7. GenBank Accession numbers follow the species; common names are in parentheses.
